# Supplementary material for: Short-Term Ambient Air Pollution and Urticaria in Guangzhou, China: Estimating the Association and Population Attributable Fraction
Source: MDPI journal article supplement (doi:10.3390/toxics11120949), 2023-11-21
Supplement: s1 [file s1]

**Table S1.** Sensitivity analysis for urticaria outpatient visits associated with each 10  $\mu\text{g}/\text{m}^3$  increment of air pollution at lag05.

| Pollutants        | Models                   | Urticaria         |
|-------------------|--------------------------|-------------------|
| PM <sub>2.5</sub> | df=5 for temporal trends | 1.28 (0.46, 2.10) |
|                   | df=7 for temporal trends | 1.01 (0.16, 1.87) |
|                   | df=8 for temporal trends | 1.05 (0.19, 1.92) |
|                   | df=5 for temperature     | 1.24 (0.42, 2.06) |
|                   | df=7 for temperature     | 1.23 (0.42, 2.05) |
|                   | df=8 for temperature     | 1.23 (0.42, 2.05) |
| PM <sub>10</sub>  | df=5 for temporal trends | 1.05 (0.47, 1.64) |
|                   | df=7 for temporal trends | 0.94 (0.33, 1.56) |
|                   | df=8 for temporal trends | 0.91 (0.26, 1.56) |
|                   | df=5 for temperature     | 0.89 (0.29, 1.50) |
|                   | df=7 for temperature     | 0.88 (0.28, 1.49) |
|                   | df=8 for temperature     | 0.88 (0.28, 1.49) |
| NO <sub>2</sub>   | df=5 for temporal trends | 3.13 (2.24, 4.02) |
|                   | df=7 for temporal trends | 2.81 (1.81, 3.82) |
|                   | df=8 for temporal trends | 2.78 (1.79, 3.78) |

---

|                 |                          |                   |
|-----------------|--------------------------|-------------------|
|                 | df=5 for temperature     | 3.10 (2.16, 4.04) |
|                 | df=7 for temperature     | 3.08 (2.15, 4.02) |
|                 | df=8 for temperature     | 3.09 (2.16, 4.03) |
| SO <sub>2</sub> |                          |                   |
|                 | df=5 for temporal trends | 2.61 (0.86, 4.39) |
|                 | df=7 for temporal trends | 3.35 (1.37, 5.37) |
|                 | df=8 for temporal trends | 2.94 (1.03, 4.90) |
|                 | df=5 for temperature     | 2.81 (0.92, 4.72) |
|                 | df=7 for temperature     | 2.82 (0.94, 4.74) |
|                 | df=8 for temperature     | 2.82 (0.94, 4.74) |

---

**Table S2.** Excess risk and 95% confidence intervals of urticaria outpatient visits for each 10 µg/m<sup>3</sup> increment in air pollution at lag05 in single and two-pollutant models in Guangzhou.

| Pollutants        | Two-pollutant<br>models       | Urticaria         |
|-------------------|-------------------------------|-------------------|
| PM <sub>2.5</sub> | Control for O <sub>3</sub>    | 1.29 (0.43, 2.15) |
|                   | Control for SO <sub>2</sub>   | 1.08 (0.21, 1.95) |
| PM <sub>10</sub>  | Control for O <sub>3</sub>    | 0.93 (0.29, 1.57) |
|                   | Control for SO <sub>2</sub>   | 0.76 (0.15, 1.38) |
| NO <sub>2</sub>   | Control for PM <sub>2.5</sub> | 3.10 (2.04, 4.16) |
|                   | Control for PM <sub>10</sub>  | 3.05 (1.92, 4.18) |
|                   | Control for O <sub>3</sub>    | 3.21 (2.24, 4.18) |
| SO <sub>2</sub>   | Control for PM <sub>2.5</sub> | 2.08 (0.11, 4.08) |
|                   | Control for PM <sub>10</sub>  | 2.53 (0.58, 4.53) |
|                   | Control for O <sub>3</sub>    | 2.80 (0.88, 4.76) |
